# Supplementary material for: Sex Modulates Response to Renal-Tubule-Targeted Insulin Receptor Deletion in Mice
Source: MDPI journal article supplement (doi:10.3390/ijms24098056), 2023-04-29
Supplement: s1 [file s1]

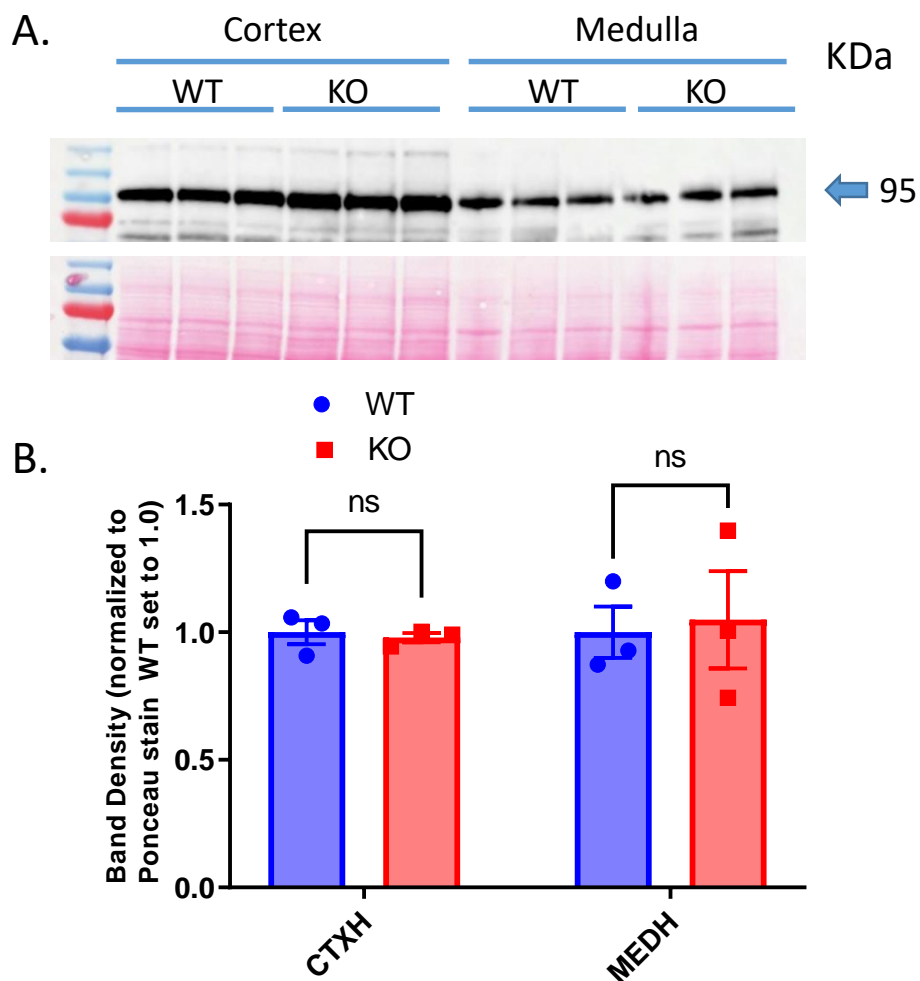

**Figure S1. No reduction in InsR- $\beta$  subunit protein in genetically-KO mice in the absence of doxycycline treatment-** A. western blot of kidney cortex (CTXH) and medullary (MEDH) homogenates from male genetic WT (floxed InsR/negative for tet-O-Cre and/or PAX8) or KO (floxed InsR/positive for both tet-O-Cre and PAX8 transgenes); unpaired t-test within each region; 40  $\mu$ g protein loaded/lane/sample.
